# Supplementary material for: Inhibition of DNA methyltransferase as a novel therapeutic strategy to overcome acquired resistance to dual PI3K/mTOR inhibitors
Source: PubMed Central journal article supplement (PMC4467138; doi:10.18632/oncotarget.3016), 2015-02-11
Supplement: oncotarget-06-5134-s001.pdf [file oncotarget-06-5134-s001.pdf]

## SUPPLEMENTAL FIGURES AND TABLES

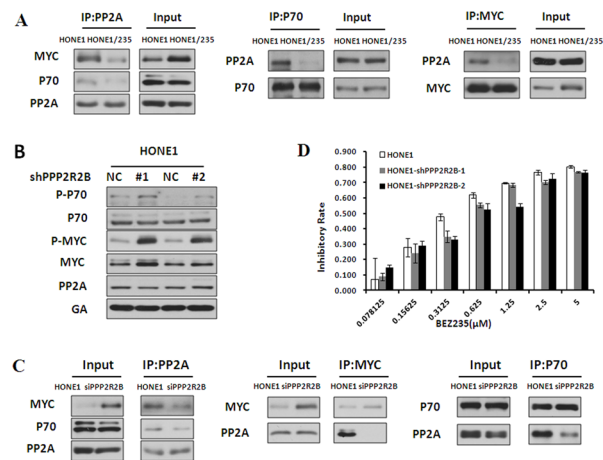

**Supplementary Figure S1:** (A) The interactions between MYC and PP2A and between P70 and PP2A were detected by immunoprecipitation in HONE1 and HONE1/235 cell lines. (B) Effect of PPP2R2B knockdown with shRNA on MYC and P70 phosphorylation in HONE1 cell line. (C) Effect of PPP2R2B knockdown on the interactions between MYC and PP2A and between P70 and PP2A in the HONE1 cell line based on immunoprecipitation. (D) The sensitivity of HONE1 to BEZ235 after PPP2R2B knockdown by PPP2R2B shRNA using the MTT assay.

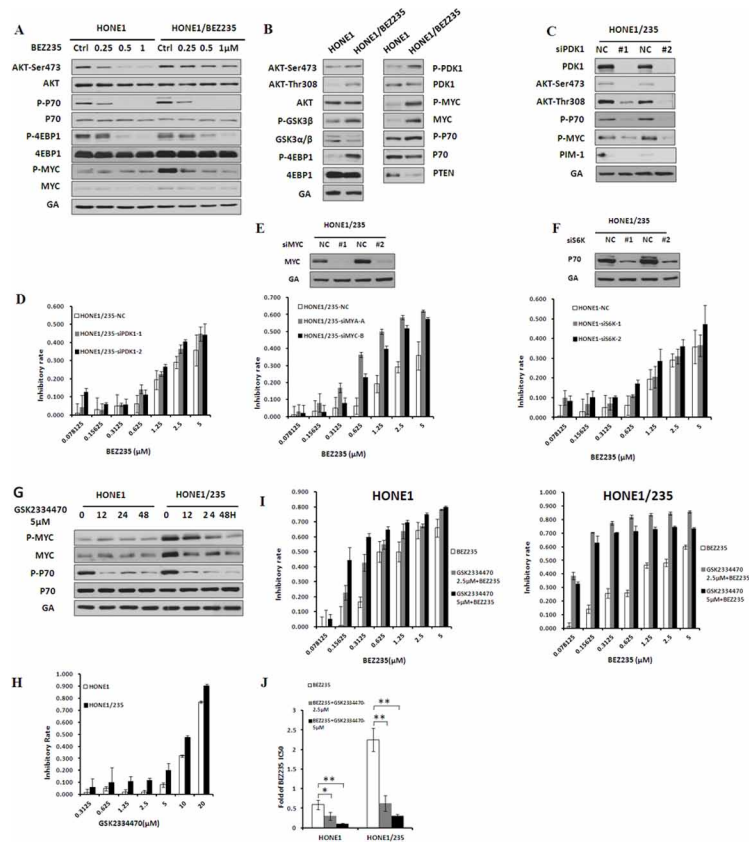

**Supplementary Figure S2:** (A) Effect of BEZ235 on the PI3K/AKT/mTOR and PDK1/MYC survival pathway in HONE1 and HONE1/235 cells by immunoblotting analysis. (B) Differential activation of the PI3K/AKT/mTOR and PDK1/MYC survival pathways in HONE1 and HONE1/235 by immunoblotting analysis. (C) Effect of PDK1 knockdown on P-AKT, P-P70, P-Myc, and PIM1 expression in HONE1/235 cells. (D) Sensitivity to BEZ235 in HONE1/235 cells after PDK1 knockdown using the MTT assay. (E) Effect of MYC knockdown on the sensitivity to BEZ235 in HONE1/235 cells. (F) Effect of P70(S6K) knockdown on the sensitivity to BEZ235 in HONE1/235 cells. (G) Effect of the PDK1 inhibitor GSK2334470 on MYC and P70 phosphorylation in HONE1/235 cell line by immunoblotting analysis. (H) Sensitivity to GSK2334470 in HONE1/235 cells after treatment with GSK2334470 for 5 d using the MTT assay. (I) Inhibitory effect of GSK2334470 in combination with BEZ235 on cell proliferation in HONE1/235 cells using the MTT assay. (J) IC50 values of BEZ235 with or without GSK2334470 in HONE1 and HONE1/235 cell lines. The data shown are representative of 3 individual experiments.

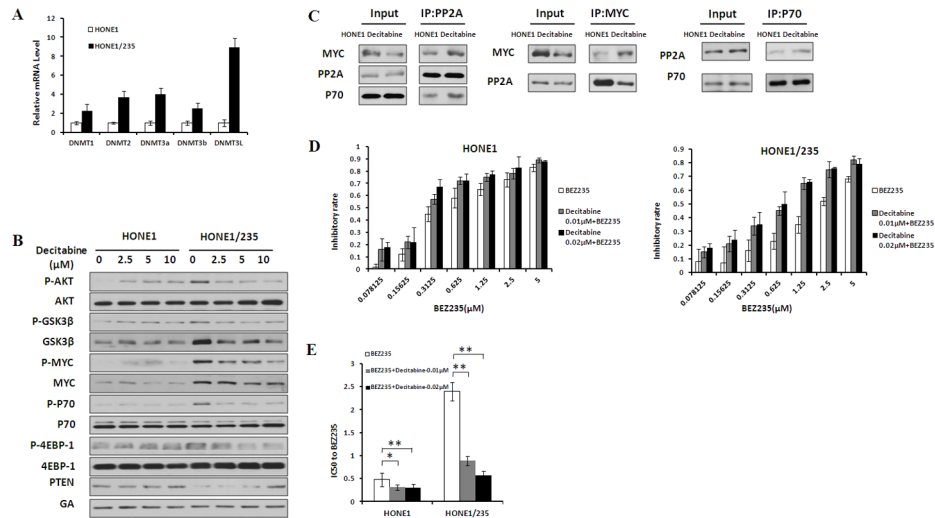

**Supplementary Figure S3:** (A) The mRNA levels of DNA methyltransferases were analyzed in HONE1 and HONE1/235 cell lines by q-PCR. (B) Effects of decitabine on the expression of survival pathway proteins at the indicated concentrations. (C) Effects of decitabine on the binding of MYC and PP2A and of P70 and PP2A in the HONE1/235 cell line. Cells were treated with 1  $\mu$ M decitabine for 48 h. Immunoprecipitation was conducted. (D) Inhibitory effect of decitabine and BEZ235 on cell proliferation in HONE1 and HONE1/235 cell lines. Cells were treated for 5 d at the indicated concentrations. The MTT assay was conducted. (E) The IC<sub>50</sub> values of BEZ235 with or without decitabine were determined in HONE1 and HONE1/235 cell lines using the MTT assay. The data shown are representative of 3 individual experiments.

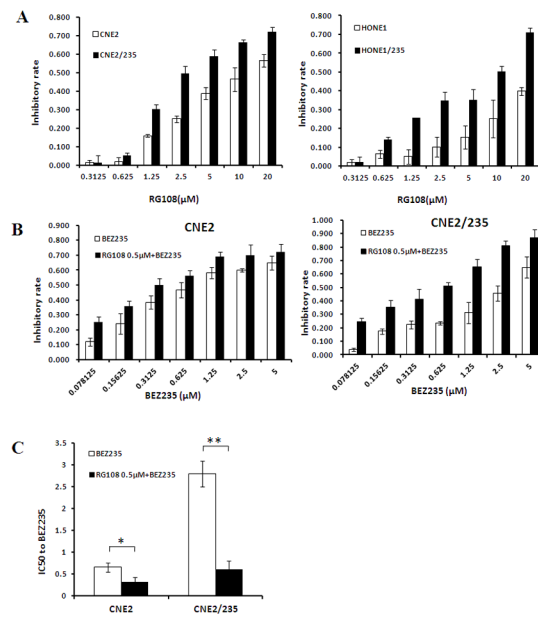

**Supplementary Figure S4:** (A) Effect of the DNA methylation inhibitor RG108 on cell proliferation in the parental and resistant cell lines using the MTT assay. (B) Inhibitory effect of RG108 and BEZ235 on cell proliferation in BEZ235-resistant cell lines. Cells were treated for 5 d at the indicated concentrations. The MTT assay was conducted. (C) The IC<sub>50</sub> values of BEZ235 with or without RG108 were determined in parental and resistant cell lines using the MTT assay. The data shown are representative of 3 individual experiments.

**Supplementary Table S1: Oncomutation panel mutation list report**

| Sample | Gene   | Assay    | Mutation | Allele | WT Frequency | Mutation Frequency | Z-Score | Confidence |
|--------|--------|----------|----------|--------|--------------|--------------------|---------|------------|
| CNE1   | HRAS   | HRAS_3   | G13R     | G      | 0.808        | 0.193              | 10      | High       |
| CNE1   | HRAS   | HRAS_3   | G13R     | G      | 0.81         | 0.19               |         |            |
| CNE2   | HRAS   | HRAS_3   | G13R     | G      | 0.753        | 0.218              | 10      | High       |
| CNE2   | HRAS   | HRAS_3   | G13R     | G      | 0.75         | 0.22               |         |            |
| CNE2   | PIK3CA | PIK3CA_9 | H1047R   | G      | 0.363        | 0.637              | 10      | High       |
| CNE2   | PIK3CA | PIK3CA_9 | H1047R   | G      | 0.45         | 0.55               |         |            |
| HONE1  | HRAS   | HRAS_3   | G13R     | G      | 0.796        | 0.204              | 7.98    | High       |
| HONE1  | HRAS   | HRAS_3   | G13R     | G      | 0.8          | 0.2                |         |            |
| HONE1  | PIK3CA | PIK3CA_9 | H1047R   | G      | 0.497        | 0.503              | 10      | High       |
| HONE1  | PIK3CA | PIK3CA_9 | H1047R   | G      | 0.5          | 0.5                |         |            |
| SUNE1  | PIK3CA | PIK3CA_9 | H1047R   | G      | 0.484        | 0.516              | 10      | High       |
| SUNE1  | PIK3CA | PIK3CA_9 | H1047R   | G      | 0.48         | 0.52               |         |            |

**Supplementary Table S2: PPP2R2B and PTEN gene methylation were increased in BEZ235 resistance cell line**

|         | CNE2-235/CNE2<br>DiffScore | CNE2-235/CNE2<br>Delta.Beta | Gene region |
|---------|----------------------------|-----------------------------|-------------|
| PPP2R2B | 374.3439                   | 0.560642                    | Island      |
| PTEN    | 65.58192                   | 0.2575                      | Body        |

DiffScore > 13 and Delta.Beta > 0.17 means hypermethylation.
